# Supplementary material for: The Involvement of Antioxidant Enzyme System, Nitrogen Metabolism and Osmoregulatory Substances in Alleviating Salt Stress in Inbred Maize Lines and Hormone Regulation Mechanisms
Source: MDPI journal article supplement (doi:10.3390/plants11121547), 2022-06-10
Supplement: s1 [file s1]

# Supplementary Materials:

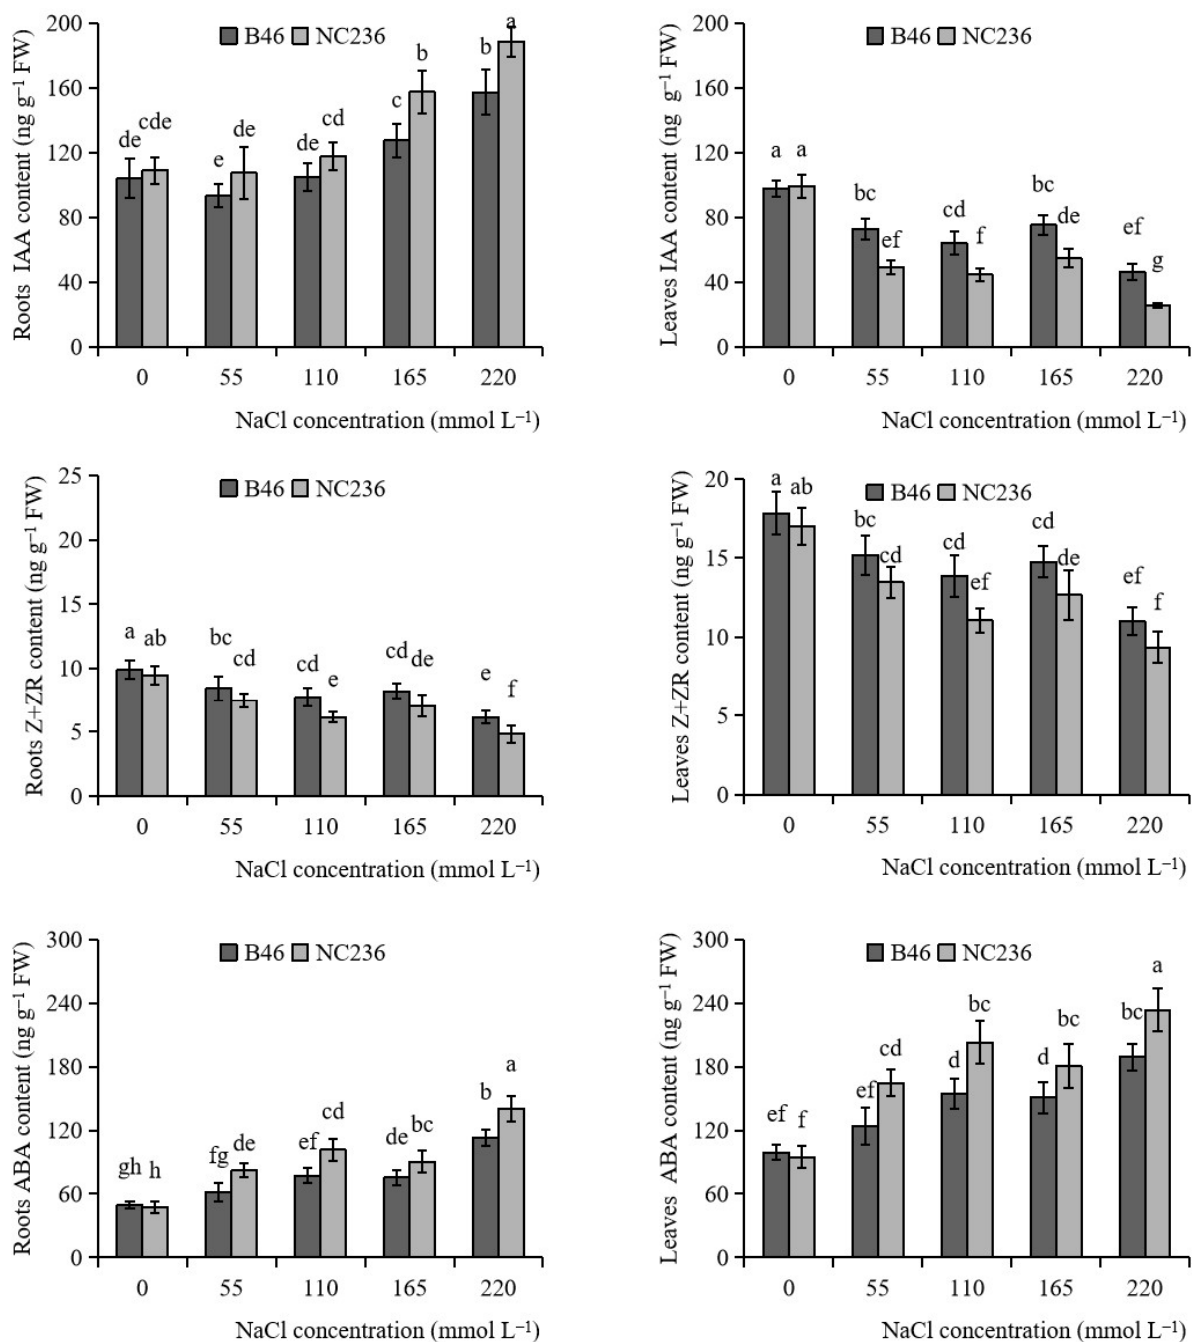

Figure S1. Effects of salt stress on the contents of IAA, Z+ZR, and ABA in maize roots and leaves. Data are expressed as mean  $\pm$  standard deviation. Different letters within the same column indicate significant difference at the 5% level.

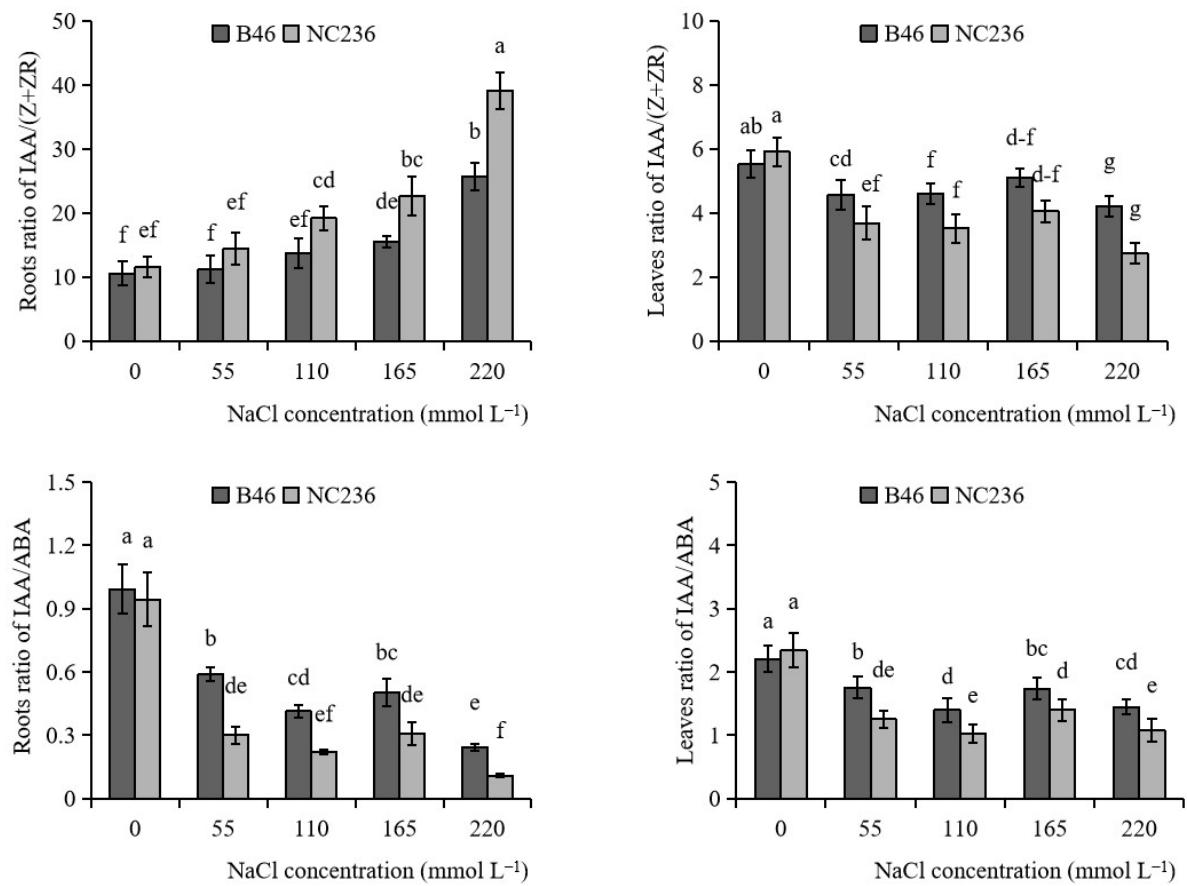

**Figure S2.** Effects of salt stress on the ratio of IAA/(Z+ZR) and IAA/ABA in maize roots and leaves. Data are expressed as mean  $\pm$  standard deviation. Different letters within the same column indicate significant difference at the 5% level.
